# Supplementary material for: A novel bioemulsifier produced by Exiguobacterium sp. strain N4-1P isolated from petroleum hydrocarbon contaminated coastal sediment
Source: Royal Society of Chemistry journal article supplement (doi:10.1039/c7ra07411e), 2017-01-01
Supplement: c7ra07411e1.pdf [file c7ra07411e1.pdf]

**A novel bioemulsifier produced by *Exiguobacterium sp.* strain N4-1P isolated from  
petroleum hydrocarbon contaminated coastal sediment**

**-- Supplementary Information**

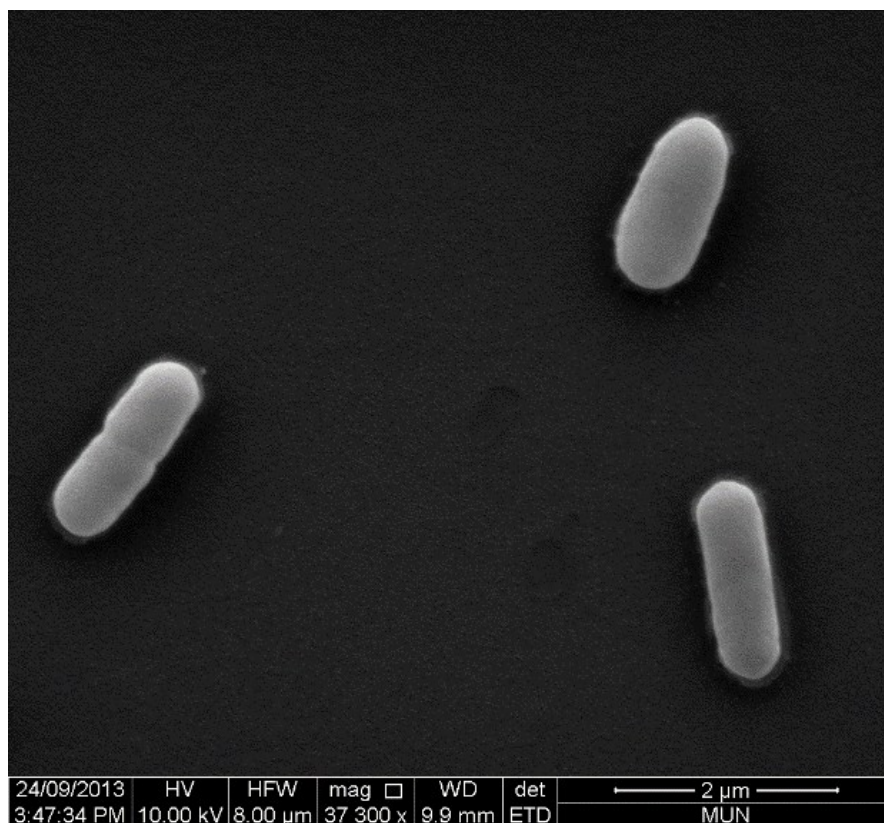

**Fig. S1** SEM visualization results of *Exiguobacterium sp.* N4-1P

**Table S1** BIOLOG® metabolic profile

| Characteristics                   | <i>E. mexicanum</i>    | <i>E. aurantiacum</i> | <i>E. aestuari</i>     | <i>E. marinum</i>      | <i>E. artemiae</i>     | <i>E. acetylicum</i>   | <i>E. undae</i>        | <i>E. antarcticum</i>  | <i>E. oxidotolerans</i> | <i>E. sp. N4-1P</i> |
|-----------------------------------|------------------------|-----------------------|------------------------|------------------------|------------------------|------------------------|------------------------|------------------------|-------------------------|---------------------|
|                                   | DSM 16483 <sup>T</sup> | DSM 6208 <sup>T</sup> | DSM 16306 <sup>T</sup> | DSM 16484 <sup>T</sup> | DSM 16484 <sup>T</sup> | DSM 20146 <sup>T</sup> | DSM 14481 <sup>T</sup> | DSM 14480 <sup>T</sup> | DSM 17272 <sup>T</sup>  |                     |
| $\alpha$ -Cyclodextrin            | +                      | -                     | +                      | +                      | +                      | -                      | -                      | -                      | +                       | -                   |
| $\beta$ -Cyclodextrin             | +                      | -                     | +                      | +                      | +                      | -                      | -                      | -                      | +                       | -                   |
| Glycogen                          | +                      | -                     | +                      | +                      | +                      | +                      | +                      | +                      | +                       | -                   |
| Mannan                            | -                      | +                     | -                      | +                      | -                      | +                      | w                      | w                      | +                       | -                   |
| <i>N-Acetyl</i><br>mannosamine    | +                      | -                     | +                      | w                      | -                      | -                      | w                      | w                      | -                       | w                   |
| Cellobiose                        | -                      | -                     | -                      | w                      | +                      | +                      | +                      | +                      | +                       | +                   |
| d-Galactose                       | -                      | -                     | -                      | -                      | -                      | -                      | +                      | +                      | +                       | -                   |
| d-Gluconic acid                   | -                      | -                     | -                      | w                      | +                      | -                      | -                      | -                      | -                       | w                   |
| d-Mannitol                        | -                      | -                     | +                      | +                      | +                      | +                      | +                      | -                      | +                       | +                   |
| 3-Methyl glucose                  | -                      | +                     | +                      | +                      | +                      | +                      | +                      | +                      | w                       | -                   |
| d-Raffinose                       | -                      | -                     | +                      | -                      | -                      | -                      | +                      | +                      | +                       | -                   |
| d-Ribose                          | +                      | -                     | +                      | +                      | +                      | -                      | +                      | +                      | +                       | w                   |
| Salicin                           | -                      | -                     | +                      | +                      | +                      | -                      | -                      | -                      | -                       | -                   |
| d-Sorbitol                        | +                      | -                     | +                      | +                      | +                      | +                      | -                      | -                      | +                       | w                   |
| Turanose                          | +                      | -                     | -                      | -                      | +                      | -                      | -                      | -                      | -                       | -                   |
| d-Xylose                          | +                      | -                     | -                      | -                      | -                      | -                      | -                      | -                      | -                       | -                   |
| Acetic acid                       | +                      | -                     | +                      | +                      | +                      | w                      | +                      | +                      | +                       | w                   |
| $\gamma$ -Hydroxy-butiric<br>acid | -                      | -                     | +                      | +                      | -                      | -                      | w                      | w                      | -                       | -                   |

|                                |   |   |   |   |   |   |   |   |   |   |
|--------------------------------|---|---|---|---|---|---|---|---|---|---|
| $\alpha$ -ketovaleric acid     | + | + | + | + | - | + | + | + | + | + |
| d-Lactic acid<br>methyl ester  | - | - | - | - | + | - | - | - | - | - |
| l-Lactic acid                  | + | - | - | - | - | - | - | - | - | - |
| Methylpyruvate                 | + | + | + | - | - | - | - | - | + | w |
| Methylsuccinate                | - | - | - | - | - | - | w | w | - | w |
| Propionic acid                 | + | - | + | + | - | - | - | w | + | - |
| d-Alanine                      | - | - | - | - | + | - | - | - | - | - |
| l-Alanine                      | - | - | - | - | + | + | w | w | - | - |
| l-Alanyl glycine               | - | - | - | - | - | w | - | + | + | - |
| l-Glycyl glutamic<br>acid      | - | - | - | - | - | - | - | + | - | - |
| l-Serine                       | - | - | - | w | - | w | - | w | - | w |
| 2,3-Butanediol                 | - | - | + | + | - | - | w | + | - | - |
| Thymidine                      | + | + | + | + | - | + | + | + | + | + |
| Adenosine 5'-<br>monophosphate | - | - | - | + | - | - | - | + | - | - |
| Thymidine 5'-<br>monophosphate | - | - | - | + | + | - | w | + | - | - |
| Uridine 5'-<br>monophosphate   | - | - | - | + | - | - | - | + | - | - |
| Fructose 6-<br>phosphate       | - | - | - | w | - | + | - | - | - | - |
| Glucose 1-<br>phosphate        | - | - | - | - | - | + | - | - | - | - |

|                                  |   |   |   |   |   |   |   |   |   |            |
|----------------------------------|---|---|---|---|---|---|---|---|---|------------|
| Glucose 6-phosphate              | - | - | - | - | - | + | - | - | - | -          |
| dl- $\alpha$ -Glycerol Phosphate | - | - | - | - | - | + | - | - | - | -          |
| Tween 40                         | - | - | - | + | - | - | - | - | - | +          |
| Tween 80                         | - | - | - | + | - | - | - | - | - | +          |
| Reference                        | 1 | 2 | 3 | 3 | 1 | 1 | 2 | 2 | 4 | This study |

---

**Table S2** PLFA composition of *Exiguobacterium* sp. N4-1P and relevant strains (Unit: %, n=3)

| Fatty acids       | <i>E.</i><br><i>mexicanum</i><br>DSM<br>16483 <sup>T</sup> | <i>E.</i><br><i>aurantiacum</i><br>DSM 6208 <sup>T</sup> | <i>E.</i><br><i>aestuaria</i><br>DSM<br>16306 <sup>T</sup> | <i>E.</i><br><i>marinum</i><br>DSM<br>16484 <sup>T</sup> | <i>E.</i><br><i>artemiae</i><br>DSM<br>16484 <sup>T</sup> | <i>E.</i><br><i>acetylicum</i><br>DSM<br>20146 <sup>T</sup> | <i>E. undae</i><br>DSM<br>14481 <sup>T</sup> | <i>E.</i><br><i>antarcticum</i><br>DSM<br>14480 <sup>T</sup> | <i>E.</i><br><i>oxidotolerans</i><br>DSM 17272 <sup>T</sup> | <i>E. sp.</i><br>N4-1P |
|-------------------|------------------------------------------------------------|----------------------------------------------------------|------------------------------------------------------------|----------------------------------------------------------|-----------------------------------------------------------|-------------------------------------------------------------|----------------------------------------------|--------------------------------------------------------------|-------------------------------------------------------------|------------------------|
| iC11:0            | 1.5                                                        | 2                                                        | 0                                                          | 0                                                        | 0                                                         | 0                                                           | 0                                            | 0                                                            | 0                                                           | 0                      |
| iC12:0            | 2.1                                                        | 3                                                        | 1.7                                                        | 2.6                                                      | 1.6                                                       | 0                                                           | 2                                            | 3                                                            | 1.4                                                         | 2.7                    |
| C12:0             | 8.3                                                        | 2                                                        | 0                                                          | 0                                                        | 0                                                         | 1                                                           | 0                                            | 1                                                            | 0                                                           | 0                      |
| iC13:0            | <b>11.2</b>                                                | <b>18</b>                                                | <b>11.5</b>                                                | <b>11.5</b>                                              | <b>13.2</b>                                               | 5                                                           | 9                                            | <b>12</b>                                                    | 8.5                                                         | 8.9                    |
| aC13:0            | 8.9                                                        | <b>12</b>                                                | <b>15.6</b>                                                | <b>18.1</b>                                              | <b>12</b>                                                 | 6                                                           | 9                                            | <b>11</b>                                                    | 9                                                           | <b>11.8</b>            |
| iC14:0            | 0                                                          | 0                                                        | 1.3                                                        | 0                                                        | 1.2                                                       | 1                                                           | 2                                            | 1                                                            | 2.7                                                         | 2.3                    |
| C14:0             | 6.1                                                        | 3                                                        | 0                                                          | 0                                                        | 1.3                                                       | <b>13</b>                                                   | 3                                            | 2                                                            | 0                                                           | 2.3                    |
| C14:1 $\omega$ 5c | 0                                                          | 0                                                        | 0                                                          | 0                                                        | 0                                                         | 2                                                           | 0                                            | 0                                                            | 0                                                           | 0                      |
| iC15:0            | 1.7                                                        | 4                                                        | <b>13.1</b>                                                | <b>10.4</b>                                              | <b>11.8</b>                                               | 8                                                           | <b>10</b>                                    | <b>11</b>                                                    | <b>20.7</b>                                                 | <b>15.5</b>            |
| aiC15:0           | 0                                                          | 0                                                        | 3.2                                                        | 2.6                                                      | 2.9                                                       | 1                                                           | 3                                            | 2                                                            | 4.2                                                         | 5.1                    |
| iC16:0            | 0                                                          | 0                                                        | 7.1                                                        | 5                                                        | 1.4                                                       | 0                                                           | 2                                            | 0                                                            | 7.1                                                         | 0                      |
| C16:1             | 16.8                                                       | 10                                                       | 0                                                          | 0                                                        | 4.5                                                       | 41                                                          | 8                                            | 21                                                           | 0                                                           | <b>11.4</b>            |
| C16:0             | <b>32.8</b>                                                | <b>27</b>                                                | 5.3                                                        | 4.3                                                      | <b>22.9</b>                                               | <b>10</b>                                                   | <b>17</b>                                    | <b>13</b>                                                    | 2.9                                                         | <b>12.5</b>            |
| iC17:0            | 0                                                          | 0                                                        | <b>27.2</b>                                                | <b>34.4</b>                                              | <b>12.2</b>                                               | 1                                                           | 7                                            | 5                                                            | <b>23.3</b>                                                 | <b>13.6</b>            |
| aiC17:0           | 0                                                          | 6                                                        | 8.2                                                        | 7.1                                                      | 2.1                                                       | 1                                                           | 2                                            | 0                                                            | 6.1                                                         | 5.6                    |
| C18:1             | 0                                                          | 2                                                        | 0                                                          | 0                                                        | 1.1                                                       | 7                                                           | 6                                            | 6                                                            | 0                                                           | <b>0</b>               |
| C18:0             | 7                                                          | 5                                                        | 1.7                                                        | 0                                                        | 7.7                                                       | 1                                                           | 6                                            | 5                                                            | 0                                                           | 4.82                   |
| Reference         | 1                                                          | 2                                                        | 1                                                          | 3                                                        | 3                                                         | 1                                                           | 2                                            | 2                                                            | 4                                                           | This study             |

**Table S3** Composition of the bioemulsifiers produced by *Exiguobacterium* sp. N4-1P (n=3)

| Composition          | %     | Hydrophobic moiety fatty acids | %     |
|----------------------|-------|--------------------------------|-------|
| Protein              | 0.93  | C14:0                          | 2.58  |
| Amino acids/peptides | 50.82 | C14:1                          | 3.73  |
| Carbohydrate         | 5.1   | iC15:0                         | 2.38  |
| Lipid                | 45.32 | aiC15:0                        | 1.07  |
|                      |       | C15:0                          | 0.27  |
|                      |       | C15:1                          | 3.05  |
|                      |       | iC16:0                         | 0.63  |
|                      |       | C16:0                          | 32.18 |
|                      |       | C16:1w9                        | 0.46  |
|                      |       | C16:1w7                        | 0.30  |
|                      |       | iC17:0                         | 2.00  |
|                      |       | aiC17:0                        | 1.40  |
|                      |       | C17:0                          | 1.13  |
|                      |       | C18:0                          | 40.99 |
|                      |       | C18:1w9                        | 4.45  |
|                      |       | C18:1w7                        | 1.42  |
|                      |       | C18:3w3                        | 0.50  |
|                      |       | C22:1w9                        | 1.48  |
|                      |       | $\Sigma$ Saturated             | 84.63 |
|                      |       | $\Sigma$ Monounsaturated       | 14.88 |
|                      |       | $\Sigma$ polyunsaturated       | 0.50  |
|                      |       | $\Sigma$ Branched              | 7.64  |

## References:

1. A. López-Cortés, P. Schumann, R. Pukall and E. Stackebrandt, *Syst. Appl. Microbiol.*, 2006, **29**, 183-190.
2. A. Frühling, P. Schumann, H. Hippe, B. Sträubler and E. Stackebrandt, *Int. J. Syst. Evol. Microbiol.*, 2002, **52**, 1171-1176.
3. I.-G. Kim, M.-H. Lee, S.-Y. Jung, J. J. Song, T.-K. Oh and J.-H. Yoon, *Int. J. Syst. Evol. Microbiol.*, 2005, **55**, 885-889.
4. I. Yumoto, M. Hishinuma-Narisawa, K. Hirota, T. Shingyo, F. Takebe, Y. Nodasaka, H. Matsuyama and I. Hara, *Int. J. Syst. Evol. Microbiol.*, 2004, **54**, 2013-2017.
